# Supplementary material for: Clinical value of serum DJ-1 in lung adenocarcinoma
Source: PeerJ. 2024 Jan 29;12:e16845. doi: 10.7717/peerj.16845 (PMC10832618; doi:10.7717/peerj.16845)
Supplement: Supplemental Information 1 — The raw data shows all the results in different groups. [file peerj-12-16845-s001.xls]

## Sheet: DJ1
gender	age	DJ1	CEA	CYFRA211	NSE	tumor number	smoking	Diabetes mellitus	Hypertension	tumor stage	tumor size(cm)	Differentiation	progression	time(month)	Lymph node metastasis	Distant metastasis
female	61	5.52089	7.5	2.9	13.9	single	no	no	yes	Ⅰ	2.5	poor	yes	16	no	no
male	68	5.88307	1.8	2.3	18.3	single	no	no	yes	Ⅰ	2	moderate	no	34	no	no
female	69	4.13931	2.1	2.4	11.9	single	no	no	yes	Ⅱ-Ⅳ	3.5	poor	no	70	yes	yes
male	50	3.56841	0.5	1.8	29.8	single	yes	no	no	Ⅰ	0.6	well	no	68	no	no
female	53	4.74063	2.1	1.8	17.4	single	no	no	no	Ⅰ	0.8	well	no	68	no	no
male	47	5.90422	31.7	2.8	28	single	no	no	no	Ⅱ-Ⅳ	2.2	poor	yes	4	yes	no
female	52	1.85247	3.6	1.8	9.5	single	no	no	no	Ⅰ	3.5	moderate	no	16	no	no
male	58	10.4116	1.7	2.1	31.7	multiple	no	no	no	Ⅱ-Ⅳ	2	poor	yes	12	no	no
male	63	4.71435	2.7	2.2	23.2	single	yes	no	no	Ⅰ	1.8	moderate	yes	76	no	no
male	74	3.04182	2.4	1.9	17.6	single	yes	no	yes	Ⅰ	0.8	moderate	no	33	no	no
male	66	4.15204	8.8	2.1	22.4	single	yes	yes	no	Ⅰ	2	poor	no	74	no	no
female	50	4.9523	0.8	3	13.2	multiple	no	no	no	Ⅰ	0.7	well	no	61	no	no
female	46	4.06311	1.9	1.6	14.8	multiple	no	no	no	Ⅰ	1.2	well	no	72	no	no
male	79	3.37117	22.7	1.4	20.6	single	no	no	yes	Ⅰ	3	poor	no	68	no	no
female	64	4.73406	3.2	2.9	12.5	single	no	no	no	Ⅰ	1.2	poor	no	74	no	no
female	42	7.13728	0.6	1.2	30.2	multiple	no	no	no	Ⅰ	0.6	well	no	74	no	no
male	37	5.10607	4.5	1.5	15.5	single	yes	no	no	Ⅱ-Ⅳ	1.5	poor	yes	23	yes	no
male	55	6.02461	0.7	2.3	32.9	single	yes	no	no	Ⅰ	1.3	well	yes	57	no	no
female	70	5.03904	2.6	2.2	16.7	single	no	no	yes	Ⅰ	1.7	poor	no	60	no	no
male	50	3.61799	2.5	1.3	13.7	multiple	no	no	no	Ⅰ	5.5	moderate	no	42	no	no
male	76	2.12568	4.2	4	9.9	single	yes	no	yes	Ⅰ	2	poor	no	24	no	no
female	67	4.8131	3.3	2.7	15.1	single	no	no	yes	Ⅰ	3	moderate	no	38	no	no
male	65	4.26699	5.9	1.6	11.1	single	no	no	no	Ⅱ-Ⅳ	1.5	poor	no	51	yes	no
female	56	1.29654	1.8	2.4	30.2	single	no	no	no	Ⅰ	3	poor	no	77	no	no
female	65	2.90272	1.3	1.4	14	single	no	no	no	Ⅰ	1.5	well	no	77	no	no
female	44	4.66191	1.4	3	14.2	single	no	no	no	Ⅰ	0.7	well	no	77	no	no
female	55	3.04182	6.8	1.6	15.2	single	no	no	no	Ⅱ-Ⅳ	2	poor	no	17	yes	no
male	52	4.17753	3.3	1.1	22.2	single	no	no	no	Ⅰ	1.5	moderate	no	8	no	no
female	59	3.93675	1.6	2.6	16.2	single	no	no	no	Ⅰ	0.5	poor	no	54	no	no
female	70	5.26804	27.9	3.3	17.2	single	no	no	yes	Ⅱ-Ⅳ	2.5	poor	no	8	yes	no
female	54	2.15539	0.8	2	10.2	single	no	no	no	Ⅰ	1.5	moderate	no	73	no	no
male	61	5.05243	1.6	1.3	15.7	single	yes	no	no	Ⅰ	0.6	moderate	no	67	no	no
male	49	1.32671	3.7	1.6	12	single	no	no	no	Ⅰ	0.6	moderate	no	68	no	no
male	64	9.41435	51.9	2.5	16.2	single	no	no	no	Ⅱ-Ⅳ	1.5	poor	no	49	no	yes
male	64	4.62269	3.4	10	17	single	no	no	yes	Ⅱ-Ⅳ	11	poor	yes	31	no	no
male	46	2.63226	1.6	2.7	12.1	multiple	yes	no	no	Ⅰ	1.1	well	no	77	no	no
female	71	5.36325	2.6	1.3	23	single	no	yes	no	Ⅰ	4	poor	yes	25	no	no
female	44	6.37688	0.5	1.2	12.4	single	no	no	no	Ⅰ	2.5	poor	yes	34	no	no
female	53	2.92083	1	1.2	12.7	single	no	no	no	Ⅱ-Ⅳ	5	poor	yes	58	yes	no
male	56	3.68634	2.3	1.9	10.7	single	no	yes	yes	Ⅱ-Ⅳ	2.5	poor	no	71	no	no
female	59	4.05044	3	1.2	15.4	multiple	no	no	no	Ⅱ-Ⅳ	2.5	poor	no	39	yes	no
female	76	5.78475	4.9	3.1	12.8	single	no	no	yes	Ⅱ-Ⅳ	2.5	poor	no	63	no	yes
female	70	3.4511	3.4	2.6	14.6	single	no	yes	no	Ⅱ-Ⅳ	2.5	moderate	no	75	yes	no
male	75	3.99983	5.9	4.8	9.8	single	no	no	no	Ⅰ	2.5	poor	no	59	no	no
male	52	6.42787	2.2	1.9	14.9	single	no	no	no	Ⅰ	2.2	moderate	yes	59	no	no
male	75	5.86195	14.9	2.2	18.3	single	yes	yes	yes	Ⅱ-Ⅳ	2	moderate	yes	6	yes	no
female	48	4.67501	0.6	1.2	20.3	single	no	no	no	Ⅰ	0.5	well	no	75	no	no
female	50	5.43845	0.7	1.3	10.8	single	no	no	no	Ⅱ-Ⅳ	3	moderate	no	68	yes	no
female	51	2.65023	1.7	3.1	10.8	multiple	no	no	no	Ⅰ	0.7	well	no	10	no	no
female	47	2.98732	0.3	4.6	9.8	single	no	no	no	Ⅰ	1	well	no	24	no	no
female	59	4.38265	0.9	1.2	20	multiple	no	no	no	Ⅰ	1.3	moderate	yes	59	no	no
male	54	3.96196	1.1	1.9	11.6	single	no	no	no	Ⅰ	1.5	poor	no	77	no	no
female	39	5.25448	0.5	2.2	12.6	multiple	no	no	no	Ⅰ	0.5	well	yes	14	no	no
female	60	2.75222	1.8	1.7	11.2	single	no	no	no	Ⅰ	0.8	well	no	68	no	no
male	53	5.68703	3.1	2	13.5	single	yes	no	no	Ⅱ-Ⅳ	1.5	poor	no	23	yes	no
female	30	3.7924	1.4	1.2	10.6	multiple	no	no	no	Ⅰ	0.7	well	no	68	no	no
female	50	5.38373	1.5	1	16.4	single	no	no	no	Ⅰ	0.5	well	no	60	no	no
female	60	4.62922	0.7	2.6	13.2	single	no	no	no	Ⅰ	2	moderate	no	60	no	no
female	62	4.05044	3	2.6	15.5	multiple	no	no	no	Ⅰ	2.9	moderate	no	51	no	no
female	52	3.94935	4.9	2.7	20	single	no	no	yes	Ⅱ-Ⅳ	1	moderate	no	23	no	yes
male	72	4.2286	2.6	2.5	15.2	single	yes	no	no	Ⅱ-Ⅳ	2	poor	yes	0	no	yes
male	72	5.03235	6.9	1.4	15.7	single	no	no	no	Ⅰ	3	moderate	yes	23	no	no
female	65	6.44247	0.8	1.5	16.9	single	no	no	no	Ⅰ	1.2	well	no	64	no	no
female	67	4.2286	1.2	2.5	17.2	multiple	no	no	yes	Ⅰ	1	well	no	54	no	no
male	66	5.30198	2.4	2	13.3	single	yes	no	yes	Ⅰ	1.8	moderate	no	38	no	no
female	53	6.08158	5.6	1.4	15.8	single	no	no	no	Ⅰ	2	poor	yes	13	no	no
female	50	5.70096	0.8	1.5	20	single	no	no	no	Ⅰ	0.8	moderate	yes	28	no	no
male	66	5.37007	3.3	2.4	16.7	single	no	no	no	Ⅰ	2	moderate	no	50	no	no
female	68	4.48606	2.5	1.4	13.5	single	no	yes	yes	Ⅰ	2.5	moderate	no	17	no	no
female	68	5.29518	0.6	1.2	19	single	no	no	yes	Ⅰ	1	well	no	74	no	no
male	56	1.39293	4.8	2.6	15.5	single	yes	yes	no	Ⅰ	1.5	moderate	no	76	no	no
male	79	5.20036	4.9	1.2	10.4	single	yes	no	yes	Ⅰ	4	moderate	no	31	no	no
female	50	3.33436	1.4	2	16.2	multiple	no	no	no	Ⅰ	2	moderate	no	73	no	no
male	62	5.27482	2.4	1.6	18.4	single	no	no	no	Ⅱ-Ⅳ	5.5	poor	no	67	yes	no
female	53	3.45726	3.5	1.3	16.2	single	no	no	no	Ⅰ	2.5	poor	no	36	no	no
male	61	4.83292	2.5	1.2	13.9	single	no	no	no	Ⅰ	1.2	moderate	no	32	no	no
female	62	4.25419	4.2	3.1	18.8	single	no	no	no	Ⅰ	0.7	moderate	no	74	no	no
female	54	4.49254	1.6	2	15.9	multiple	no	no	no	Ⅰ	1.5	poor	no	74	no	no
male	53	4.61616	1.1	2	14.3	multiple	no	no	no	Ⅰ	1.2	moderate	no	22	no	no
female	36	2.07816	1.5	2.1	11.2	single	no	no	no	Ⅱ-Ⅳ	2.5	poor	no	24	yes	no
male	70	3.899	2.3	1.5	13.6	single	no	no	no	Ⅰ	1.3	poor	no	69	no	no
male	65	4.14568	2.2	2.6	12.8	single	no	no	no	Ⅰ	2.5	poor	yes	11	no	no
female	69	2.89669	58.3	4.1	12	single	no	no	no	Ⅱ-Ⅳ	2.5	poor	no	79	yes	no
male	61	5.59683	1.8	1.4	14.2	single	yes	no	no	Ⅱ-Ⅳ	7	moderate	yes	4	no	no
female	63	5.26126	8.5	1.4	17.8	single	no	no	no	Ⅰ	2	moderate	no	30	no	no
female	52	2.62029	0.9	3.2	11.9	single	no	no	no	Ⅰ	1.5	moderate	no	69	no	no
female	73	4.2286	2.1	1.8	14.1	single	no	no	no	Ⅰ	1.5	poor	no	64	no	no
male	56	5.05243	1.7	1.4	14.7	single	yes	no	yes	Ⅱ-Ⅳ	2	poor	yes	22	no	yes
male	63	3.91157	1.1	0.8	16.9	multiple	no	no	no	Ⅰ	1.5	moderate	no	58	no	no
female	54	3.94305	1.7	0.8	10.1	single	no	no	no	Ⅰ	0.7	well	no	55	no	no
female	59	4.50551	1.6	2	22.4	single	no	no	no	Ⅱ-Ⅳ	1.8	poor	yes	3	yes	no
male	75	5.89717	2.7	2.8	15	single	no	no	no	Ⅰ	1.5	moderate	yes	24	no	no
female	58	6.06019	4.6	1.5	12.9	single	no	no	no	Ⅰ	0.7	well	no	74	no	no
female	59	4.76037	1.3	2.1	14.7	multiple	no	no	no	Ⅰ	1.5	moderate	no	63	no	no
male	71	5.56917	0.7	2.4	18.6	single	no	no	yes	Ⅰ	1.7	well	no	32	no	no
male	50	7.50103	4.3	3.7	20.4	single	no	yes	no	Ⅱ-Ⅳ	7.5	poor	yes	39	yes	no
male	67	6.16743	3	3.5	17.3	single	no	no	no	Ⅱ-Ⅳ	2.9	poor	yes	6	yes	no
female	73	4.20305	1.7	3.3	14.9	multiple	no	no	yes	Ⅰ	1	moderate	no	72	no	no
female	45	4.67501	2	1.6	13.5	single	no	no	no	Ⅰ	2	moderate	no	74	no	no
male	65	6.38416	8.7	1.8	19.5	single	yes	yes	no	Ⅰ	2.5	poor	no	33	no	no
female	53	6.96245	1.3	1.4	20.5	single	no	no	no	Ⅰ	0.6	well	yes	2	no	no
male	64	8.9315	3.3	1.6	23.6	single	yes	no	no	Ⅰ	2	poor	no	60	no	no
female	73	3.11466	1.8	3.6	14	multiple	no	no	yes	Ⅰ	2.5	moderate	no	31	no	no
male	74	8.06802	2.7	1.9	12.9	single	yes	yes	yes	Ⅰ	3	poor	yes	11	no	no
female	59	6.70766	1.93	1.98	15.5	single	no	no	no	Ⅰ	0.6	moderate	no	75	no	no
female	55	2.84846	1.3	0.6	12.7	multiple	no	no	no	Ⅰ	0.6	moderate	no	72	no	no
male	71	4.44721	0.9	2.1	13.4	single	no	no	yes	Ⅰ	1.4	moderate	no	45	no	no
male	63	6.09585	1.9	1.4	21.3	single	yes	no	no	Ⅰ	1.5	moderate	yes	62	no	no
female	52	2.99942	28.2	0.6	16	single	no	no	no	Ⅱ-Ⅳ	1.5	moderate	no	49	yes	no
female	53	4.96562	0.7	1.6	12.4	single	no	no	yes	Ⅰ	0.8	well	no	41	no	no
male	48	5.38373	3.3	0.5	14.2	single	no	no	no	Ⅰ	0.8	moderate	no	53	no	no
female	51	6.37688	1.3	1.1	22.2	single	no	no	no	Ⅰ	0.5	moderate	no	74	no	no
female	77	4.2734	2.4	1.9	15.9	single	no	no	no	Ⅰ	1.5	moderate	no	71	no	no
male	73	4.99228	3	1.8	17.4	single	yes	no	no	Ⅱ-Ⅳ	1.4	moderate	yes	5	yes	no
male	61	5.8198	0.5	1.4	14.2	single	no	no	no	Ⅰ	3	moderate	yes	8	no	no
female	71	4.33759	1.9	2.1	12	single	no	no	yes	Ⅰ	1.1	well	no	24	no	no
female	55	5.50712	4.2	1.4	17.4	single	no	no	yes	Ⅰ	1.2	well	yes	18	no	no
female	67	8.05988	5.3	1	14	single	yes	no	no	Ⅰ	1.8	moderate	yes	1	no	no
male	59	7.73796	3.7	0.9	16.7	single	yes	no	yes	Ⅰ	2.5	poor	yes	25	no	no
female	61	4.71435	6.9	3.4	19.7	multiple	no	no	no	Ⅰ	1.5	moderate	no	66	no	no
female	68	7.13728	2.5	1.1	15.9	multiple	no	no	no	Ⅰ	1	moderate	yes	5	no	no
female	60	5.52089	10.6	2.5	14.3	single	no	yes	no	Ⅰ	3	moderate	no	21	no	no
male	53	5.04573	1.2	3	12.1	single	no	no	no	Ⅰ	2	poor	no	41	no	no
female	54	4.71435	2.9	1.2	12.3	single	no	no	no	Ⅰ	2	poor	no	66	no	no
female	46	2.96917	2.7	1.7	13.1	single	no	no	no	Ⅰ	1.5	well	no	72	no	no
male	73	4.72749	3.5	1.6	13.9	single	yes	no	no	Ⅰ	2	moderate	no	45	no	no
female	50	4.65197	1.3	2.3	13.4	single	no	no	no	Ⅰ	3.8	moderate	no	20	no	no
female	67	6.91788	5.1	1.3	24.3	single	no	no	no	Ⅰ	4.5	poor	yes	4	no	no
male	56	8.33973	9.6	14.4	19.1	single	no	no	no	Ⅱ-Ⅳ	6	poor	no	21	yes	no
male	52	5.2682	2	2.6	11.4	single	yes	no	no	Ⅰ	1.8	moderate	no	27	no	no
male	81	2.35761	6.6	2.8	12.4	single	no	no	yes	Ⅰ	2.5	poor	no	66	no	no
male	75	6.41668	2.2	3.1	14.1	multiple	no	no	yes	Ⅰ	1	moderate	yes	26	no	no
male	87	6.90619	3.74	1.28	21.75	single	no	no	no	Ⅰ	0.5	well	no	43	no	no
female	51	3.12864	1.21	1.55	11.25	single	no	no	no	Ⅰ	1.1	moderate	no	60	no	no
female	51	4.55978	2.48	1.57	14.38	single	no	no	no	Ⅰ	1	well	yes	25	no	no
female	53	5.55323	1.83	1.34	21.63	single	no	no	no	Ⅰ	2	moderate	yes	6	no	no
female	62	8.34469	2.93	3.18	23.65	single	no	yes	yes	Ⅰ	0.9	well	no	57	no	no
male	50	6.41562	3.55	2.36	15.68	single	no	no	no	Ⅰ	3	poor	yes	48	no	no
male	52	8.51893	3.87	1.84	25.92	single	yes	yes	no	Ⅰ	1.6	poor	yes	60	no	no
female	73	3.84877	2.09	2.09	25.07	single	no	no	yes	Ⅰ	1.5	moderate	no	62	no	no
female	63	9.37869	1.62	3.05	18.51	single	no	no	yes	Ⅰ	0.7	well	no	34	no	no
female	47	4.33116	2.41	1.31	12.19	single	no	no	no	Ⅰ	0.6	well	no	69	no	no
male	61	5.66617	0.805	0.753	20.99	single	no	yes	no	Ⅰ	2	moderate	no	62	no	no
male	66	4.94565	5.38	1.65	9.27	single	no	no	yes	Ⅰ	3	poor	no	60	no	no
female	26	5.46589	0.483	1.39	12.91	single	no	no	no	Ⅰ	0.6	well	no	62	no	no
male	83	4.63575	9.05	2.9	14.67	single	no	no	yes	Ⅰ	3	poor	no	55	no	no
male	70	6.1746	2.49	1.51	13.01	single	yes	no	no	Ⅰ	2	moderate	yes	29	no	no
male	40	5.58299	3.44	1.16	16.16	single	no	no	no	Ⅰ	0.6	well	yes	23	no	no
male	40	5.03235	4.04	1.33	17.61	single	no	no	no	Ⅱ-Ⅳ	2.5	poor	yes	9	no	no
male	66	7.66648	2.43	1.43	15.21	single	yes	yes	yes	Ⅰ	0.7	well	no	6	no	no
female	43	5.8198	2.54	1.69	13.18	multiple	no	no	no	Ⅰ	0.9	well	no	62	no	no
male	46	5.91834	1.47	0.926	13.58	multiple	no	no	no	Ⅰ	1	well	no	50	no	no
female	52	5.53467	1.46	1.08	19.74	single	no	no	yes	Ⅰ	0.4	well	no	23	no	no
male	63	12.5798	3.93	3.36	10.96	single	yes	no	no	Ⅰ	1.8	poor	no	32	no	no
female	34	5.41107	1.77	2.49	18.22	single	no	no	no	Ⅰ	0.6	well	no	66	no	no
female	54	6.74486	2.79	1.95	19.98	single	no	no	yes	Ⅰ	2.5	moderate	yes	41	no	no
female	62	4.63575	1.16	3.63	12.36	single	no	no	no	Ⅰ	2	moderate	no	42	no	no
female	40	3.54985	1.83	1.25	12.77	multiple	no	no	no	Ⅰ	0.7	well	yes	57	no	no
male	39	4.29263	2.32	1.83	11.71	single	no	no	yes	Ⅰ	1	well	no	69	no	no
female	65	5.90422	1.75	2.15	14.83	single	no	no	no	Ⅰ	1.6	moderate	yes	13	no	no
female	45	4.95896	2.88	1.29	13.89	multiple	no	no	no	Ⅰ	1	moderate	no	9	no	no
male	67	12.5136	3	4.97	12.9	multiple	yes	no	no	Ⅰ	0.8	moderate	yes	4	no	no
male	64	4.10753	7.73	2.09	12.21	single	yes	no	yes	Ⅰ	2.2	moderate	no	10	no	no
female	69	7.72204	1.47	1.37	14.51	multiple	no	yes	no	Ⅰ	1	well	no	61	no	no
male	66	4.08848	95.97	1.89	15.3	single	yes	no	yes	Ⅱ-Ⅳ	6.5	poor	no	11	yes	no
female	66	5.05243	1.78	1.78	10.01	single	no	yes	yes	Ⅰ	2.5	poor	no	55	no	no
female	59	7.43069	2.56	3.01	14.7	single	no	yes	no	Ⅰ	0.8	well	no	16	no	no
female	55	5.59683	2.92	2.1	13.14	multiple	no	no	no	Ⅰ	1.1	moderate	no	49	no	no
male	42	3.71748	1.67	2.15	14.1	single	no	no	no	Ⅱ-Ⅳ	7	poor	no	67	yes	no
female	65	5.54846	2.15	3.24	13.91	single	no	no	no	Ⅰ	1.5	moderate	yes	36	no	no
male	75	5.90422	2.49	2.24	18.02	single	no	no	yes	Ⅰ	1.2	well	no	57	no	no
female	70	3.50659	2.47	2.99	13.88	multiple	no	no	yes	Ⅰ	1.2	moderate	no	54	no	no
female	56	5.88307	4.31	6.55	12.89	single	no	no	yes	Ⅰ	0.5	well	no	52	no	no
female	76	4.866	1.48	3.96	15.63	single	no	yes	yes	Ⅰ	2.5	poor	no	54	no	no
female	51	4.07579	0.88	2.67	11.35	single	no	no	no	Ⅰ	1	moderate	no	46	no	no
female	71	5.02567	4.08	1.48	16.24	single	no	no	no	Ⅰ	1.5	moderate	no	22	no	no
female	63	5.33599	25.12	3.59	9.88	multiple	no	no	no	Ⅱ-Ⅳ	5	moderate	yes	9	yes	no
male	68	5.96784	12.81	1.86	11.11	single	no	no	no	Ⅰ	1.3	poor	no	16	no	no
male	45	7.61112	4.24	1.72	18.75	single	no	yes	no	Ⅰ	2	moderate	no	53	no	no
female	59	6.50834	1.26	2.45	17.62	single	no	no	no	Ⅰ	1.4	moderate	no	62	no	no
male	53	7.08385	1.97	1.98	26.17	single	no	no	no	Ⅱ-Ⅳ	2	poor	yes	1	yes	no
female	65	7.70615	0.867	2.32	16.52	single	no	no	yes	Ⅰ	0.6	well	no	11	no	no
male	67	6.31158	5.19	3.72	13.27	single	no	yes	no	Ⅰ	2.5	poor	no	62	no	no
male	26	3.35889	1.41	1.41	15.27	single	no	no	no	Ⅰ	0.5	well	no	57	no	no
female	50	6.26097	2.08	1.23	12.5	multiple	no	no	no	Ⅰ	1.5	moderate	yes	37	no	no
male	41	5.41107	2.48	2.22	15.94	single	no	no	no	Ⅰ	0.7	well	no	61	no	no
female	47	5.87603	0.832	2.15	17.9	single	no	no	no	Ⅰ	0.8	well	no	60	no	no
female	77	3.5746	0.953	2.85	14.3	single	no	no	no	Ⅰ	0.9	well	no	44	no	no
female	51	5.2816	0.495	1.52	15.93	single	no	no	no	Ⅰ	1.5	well	no	61	no	no
female	60	8.34747	7.7	1.9	18.8	single	no	no	no	Ⅰ	2	moderate	no	76	no	no
male	75	12.3929	3.7	2.6	11.8	single	no	no	yes	Ⅰ	3	moderate	no	21	no	no
female	67	3.40188	1.3	2.2	17.6	single	no	yes	no	Ⅰ	2	moderate	no	44	no	no
female	59	3.35276	3	3	13.4	single	no	no	no	Ⅰ	1.2	moderate	no	55	no	no
female	64	3.98088	3.5	1.5	13.2	single	no	no	no	Ⅰ	4.5	moderate	no	54	no	no
male	59	10.1277	2.8	3.6	22.4	single	yes	no	no	Ⅰ	2.7	poor	yes	31	no	no
female	48	6.07445	3.4	2.2	14.1	single	no	no	no	Ⅱ-Ⅳ	2.5	moderate	no	28	yes	no
female	46	4.98561	1.9	2.8	15.9	single	no	no	no	Ⅰ	0.5	well	no	61	no	no
female	48	3.66146	1.1	1	8	single	no	no	no	Ⅰ	0.8	well	no	48	no	no
female	62	4.78672	2.1	1.2	17	single	no	no	yes	Ⅱ-Ⅳ	5	moderate	yes	62	yes	no
male	59	10.7597	4.8	2.2	18	single	no	no	no	Ⅰ	2	poor	no	11	no	no
female	73	6.20334	3.7	1.7	10.9	single	no	no	yes	Ⅰ	3	moderate	no	25	no	no
female	47	4.7679	1.3	1.7	16.2	single	no	no	yes	Ⅰ	1.5	moderate	yes	46	no	no
female	62	6.40632	77.7	4.8	19.4	single	no	no	no	Ⅱ-Ⅳ	3	poor	yes	5	yes	no
female	54	5.96587	3.7	1.5	10.9	single	no	no	no	Ⅰ	1.7	poor	yes	27	no	no
male	50	7.70983	6.7	1.8	35.7	single	yes	no	no	Ⅱ-Ⅳ	3	poor	no	33	yes	no
male	79	6.01587	24.6	3.2	14.5	single	yes	no	no	Ⅱ-Ⅳ	3.5	poor	yes	47	yes	yes
female	45	3.27391	2.4	2.8	10.7	single	no	no	no	Ⅰ	0.5	well	no	57	no	no
female	70	5.37302	1.3	2.1	13.1	multiple	no	no	no	Ⅱ-Ⅳ	1.2	well	yes	1	no	yes
female	24	5.87347	0.6	1.8	16.7	single	no	no	no	Ⅰ	1	moderate	no	74	no	no
female	44	5.11756	0.6	1.2	18.7	single	no	no	no	Ⅰ	0.5	well	no	74	no	no
male	54	6.13981	1.98	2.68	27.12	single	no	no	no	Ⅰ	0.8	well	yes	19	no	no
female	52	3.19382	0.86	1.45	10.52	single	no	no	no	Ⅰ	1.8	poor	no	26	no	no
male	54	4.67623	1.28	2.11	14.14	single	yes	no	no	Ⅰ	0.6	well	no	59	no	no
male	59	6.87222	1.68	2.06	10.66	single	no	yes	yes	Ⅰ	0.7	well	no	62	no	no
male	59	6.16833	2.46	1.35	16.87	single	no	no	no	Ⅰ	0.7	well	no	63	no	no
female	69	3.27459	1.65	2.36	12.07	single	no	no	no	Ⅰ	0.6	well	no	62	no	no
female	52	4.16319	0.709	3.75	13.99	single	no	no	no	Ⅰ	0.5	well	no	62	no	no
female	40	6.70235	2.27	1.13	25.8	single	no	no	no	Ⅰ	0.8	well	no	51	no	no
female	61	3.04182	1.51	3.56	34.22	single	no	yes	no	Ⅰ	5.5	moderate	no	52	no	no
female	67	3.43263	2.43	3.74	13.92	single	no	no	no	Ⅰ	0.5	well	no	58	no	no
female	59	6.97001	1.55	2.36	16.29	single	no	no	no	Ⅰ	1	well	no	31	no	no
female	67	3.69879	0.875	3.51	14.98	single	no	no	yes	Ⅰ	1.5	moderate	no	57	no	no
male	67	6.32607	4.54	0.771	18.57	single	no	no	no	Ⅰ	0.6	well	no	59	no	no
female	47	6.95489	5.71	1.57	14.6	single	no	no	no	Ⅰ	2.3	poor	no	4	no	no

## Sheet: control
Healthy control						benign pulmonary disease group
DJ-1	CEA	CYFRA211	NSE			DJ-1	CEA	CYFRA211	NSE
4.49	4.46	1.08	12.35			4.86	2.75	1.25	14.29
2.76	3.44	1.91	11.04			3.42	2.27	2.17	21.42
1.66	4.01	1.68	14.15			1.99	0.82	0.84	14.64
2.31	2.03	2.25	13.31			3.92	2.9	1.76	15.42
2.7	3.55	2.44	12.05			3.48	1.44	1.85	11.88
2.29	0.93	1.29	11.35			6.33	2.66	0.54	11.05
4.13	0.86	1.86	12.2			2.78	2.22	1.2	13.3
3.92	1.69	2.73	11.42			1	5.98	2.31	16.06
4.14	3.26	4.31	8.86			2.9	1.34	4.06	26.93
2.91	1.93	1.55	12.26			4.56	0.87	1.66	12.83
2.15	1.25	1.87	14.5			4.45	0.2	5	13.6
1.97	1.33	2.25	12.22			4.56	2.37	1.18	13.31
2.78	0.72	1.66	16.61			5.53	1.34	0.89	8.34
2.2	0.28	0.97	9.71			5.29	10.13	7.38	27.64
3.98	0.98	2.18	15.98			6.56	1.15	1.38	15.4
2.69	2.54	1.72	11.63			2.49	1.4	1.85	18.6
3.47	4.64	1.92	11.97			3.66	6.25	3.14	29.7
3.71	1.23	2.75	13.4			4.88	5.6	2.45	16.62
4.42	0.86	1.41	7.45			5.09	2.7	1.61	15.78
3.92	2.36	1.2	10.59			3.03	2.2	2.69	17.32
2.66	0.34	1.31	13.85			5.32	2.31	1.65	11.12
2.74	1.33	1.34	10.95			5.12	2.42	2	18.69
2.75	1.88	2.12	11.31			4.29	1.21	1.53	13.61
2.79	2.96	0.92	10.46			4.04	6.18	1.75	16.33
2.47	1.96	1.21	9.49			3.34	2.95	2.21	18.67
2	2.76	1.43	15.17			4.09	1.04	2.11	13.54
6.08	1.64	2.51	10.16			3.15	3.66	2.22	8.21
3.67	1.66	1.58	15.89			3.63	0.88	4.65	19.61
2.06	2.44	2.17	19.3			5.63	2.48	1.29	12.68
2.32	2.36	3.19	16.53			3.33	1.01	1.33	11.41
2.3	2.13	3.5	14.09			3.51	1.41	1.55	14.58
2.16	1.01	3.12	8.66			2.51	3.6	2.63	19.67
5.3	1.05	1.57	10.25			3.77	0.84	1.08	13.92
1.53	3.32	0.94	10.4			6.57	1.25	1.52	5.78
2.23	1.31	1.75	15.58			3.23	2.04	2.14	12.98
3.03	0.82	1.91	14.03			4.43	1.65	1.41	12.59
2.2	1.32	1.18	13.88			5.41	2.02	1.78	14.4
3.91	1.84	1.92	9.08			2.02	1.13	2.2	12.23
3.43	1.08	0.99	9.74			4.03	1.36	1.4	22.14
2.45	1.64	1.06	10.31			1.99	2.04	1.8	12.11
4.61	0.47	1.23	10.12			2.3	1.92	1.7	16.06
4.79	2.49	1.14	9.52			3.25	1.44	1.23	13.61
2.52	1.31	3.26	9.63			6.35	1.14	2.81	14.18
5.41	2.33	1.68	12.28			4.03	0.79	1.34	10.93
4.08	0.5	1.25	18.66			3.49	15.03	2.88	9.99
2.76	3.68	2.83	14.65			3.09	1.75	4.38	11.13
4.15	2.76	2.33	13.06			3.62	2.79	1.09	22.23
3.27	2.6	2.2	12.75			5.17	3.63	1.15	13.42
2.94	1.23	2.57	15.46			3.66	6.55	4.65	18.02
2.61	2.57	2.54	12.1			4.81	6.65	8.32	15.23
4.17	3.16	2.14	11.31			4.19	0.91	1.67	12.64
3.59	1.08	1.06	8.51			4.91	2.46	1.32	12.17
3.21	0.56	2.21	11.87			4.56	0.92	1.85	16.14
3.15	1.1	1.3	8.99			3.48	1.03	1.75	13.19
3.64	2.03	2.11	12.58			5.62	1.09	2.02	14.9
3.85	2.27	1.86	12.69			2.87	2.64	2.33	14.66
2.58	1.03	2.49	19.06			6.7	3.5	3.09	14.84
4.31	0.58	2.68	7.79			2.21	1.18	2.53	11.99
4.12	1.51	1.59	10.23			3.95	1.87	1.19	14.03
1.25	2.48	1.86	12.37			4.06	2	2.91	14.82
4.05	2.21	1.47	10.33			3.55	1.35	0.94	19.22
2.19	0.33	0.7	14.27			3.29	2.56	2.29	17.49
2.42	0.56	2.56	10.11			3.08	1.56	1.7	13.14
3.27	1.09	1.71	12.45			3.91	1.91	1.72	15.21
3.51	1.48	1.67	11.91			3.81	1.96	2.14	7.98
3.82	3.64	1.76	8.18			5.16	42.94	8.48	99.06
4.41	3.81	0.89	10.76			4.06	1.34	1.73	11.74
2.41	1.31	1.61	13.09			4.73	2.09	1.99	13.75
3.53	2.37	1.62	14.51			3.06	3.88	2.17	14.62
4.24	2.58	1.6	13.51			3.96	1.89	12.36	40.31
4.61	0.86	1.71	11.35			4.85	1.34	1.73	11.74
4.34	0.73	2.21	10.85			3.11	2.09	1.99	13.75
1.76	1.72	1.99	12.9			2.41	3.88	2.17	14.62
2.37	0.69	1.53	11.63			5.07	1.89	12.36	40.31
3.34	1.1	1.14	19.48			3.03	1.65	1.15	5.87
4.53	0.64	2.09	10.14			3.5	1.33	6.84	14.71
2.98	1.43	2.63	12.58			2.18	504.3	31.58	19.87
4.66	3.08	1.28	11.44			11.78	5.4	3.03	12.71
5.86	0.78	1.5	14.44			2.13	4.08	1.8	19.32
4.03	3.94	1.4	14.69			5.57	6.33	6.69	31.44
2.46	0.53	1.61	10.28			1.69	1.65	1.62	13.26
2.69	1.97	3.91	13.69			1.33	4.95	3.79	10.41
4.31	2.92	2.47	13.39			0.27	0.38	2.57	9.56
3.6	2	2.21	12.67			1.47	1.14	1.24	5.86
4.17	1.42	1.65	8.81			3.37	2.35	3.67	10.66
4.25	0.69	1.19	11.43			3.69	2.82	2.9	22.35
5.13	1.75	2.52	12.09			3.61	4.81	4.24	19.02
5.53	2.05	2.12	9.23			3.38	1.56	2.31	10.52
4.73	1.13	1.66	10.41			2.36	3.5	1.67	16.86
0.75	0.29	1.66	10.27			2.47	5.87	7.44	12.73
2.38	1.76	2.29	12.68			6.6	4.8	2.33	12.96
4.75	2.09	3.01	10.97			3.46	1.33	1.91	9.43
5.95	0.89	2.32	12.78			2.85	10.25	3.16	15.97
4.41	1.11	2.55	15.51			2.23	5.32	20.9	37.91
5.46	1.83	2.03	11.83			4.17	2.08	2.04	21.04
4.92	2.54	1.73	13.58			2.92	1.66	1.78	14.08
4.91	2.93	2.84	13.09			1.92	3.99	1.68	18.14
5.38	1.37	2.62	17.55			2.88	2.08	1.65	15.22
5.97	3.09	3.02	11.51			5.98	6.52	3.69	13.85
						2.93	5.39	2.37	30.9
						4.15	1.3	1.33	13.4
						5.94	2.9	2.2	16.35
						4.49	3.56	2.35	14.36
						5.4	1.46	1.49	13.69
						2.2	2.8	1.44	11.13
						4.49	1.25	5.13	19.5
						3.01	3.61	1.66	14.82
						3.61	2.56	1.69	13.7
						3.51	10.31	7.12	17.28
						3.66	3.76	3.21	17.84
						6.36	0.53	1.54	11.47
